# Supplementary material for: Impacts of extreme weather events on transport infrastructure in Norway
Source: Copernicus journal article supplement (doi:10.5194/nhess-2017-437), 2017-12-20
Supplement: Supplementary file [file nhess-2017-437-SC1-supplement.pdf]

## **Overview**

This work shows some results about a project for the defense of road infrastructures against hydrogeological risk. The papers results a list of outputs that are not interconnected each other: susceptibility, map, rainfall threshold, runout model are listed without any link. The authors should to prepare a more organic work rather than a list of methods and results. Moreover, being NHESS a scientific journal, a simple list of results is not worthy of publication. I suggest the authors to stress the methodology and enhance the use of research products for practical application. In other words, this work could be valuable for scientific community in the sense of practical application of scientific approach studies.

Other issue to be stressed is the hazards this paper deals. It should be snow avalanches, rock fall and debris flow. Sometimes there are also landslide. Even if some classification assimilates debris flow to landslide, this is not really true. Debris flow is the flow of a mixture of liquid and solid with nearly the same percentages. Landslide is the movement of a solid with a small contribute in percentage of liquid. To avoid confusion, authors should better specify in the text, the considered hazards. In addition about debris flows: are they landslide-induced (Iverson, 1997) or runoff generated debris flow (Coe et al., 2008)? A specification is required.

For the next revisions please use a larger character for the text.

Moreover, the authors should introduce some definition about extreme weather event.

The writer points out the European Project PARAMount (imProved Accessibility: Reliability and security of Alpine transport infrastructure related to mountainous hazards in a changing climate) dealing about the same issues of the project whose results here shown.

The following are the detailed comments and specifications.

## **Abstract**

At lines 32-33 of page 1, it seems that debris flow are not a dominant hazard as claimed at point 2.1. Authors should introduce the percentage of roads and railway threatened by debris flows.

## **Introduction**

The authors should introduce some definition about extreme weather event.

## **Methods**

At line 33 of page 3 what does it mean Table 1 alone? Authors should explicitly write that in Table 1 they list the main variables and, moreover, the reasons for those variables.

The statement at line 1 of page 4 (“Typically, the precipitation value.....lower elevations”) should be justified. Typically, in Alps the precipitation on the top is underestimated because rain gauge are usually placed at lower altitudes characterized by lower rainfall depths.

At line 18 of page 4: please write the meaning of the acronym RCM

### **2.2 perhaps exposure to hazard caused by extreme weather events?**

These maps seem independent of the climate forcing, the precipitations; authors should justify their use for assessing the exposure for the increasing of the weather extreme event magnitude (i.e. the precipitation intensity).

At line 35 of page 4 it is stated that, or snow avalanche and debris flow threaten the same locations or that debris flow hazard map are built following the same procedure and means of the snow avalanche hazard maps. In the first case, this should be well explicated. In the second case, the writer has some doubts because the two phenomena are quite different and authors should justify it.

### **2.3 Precipitation thresholds**

About DF (Debris Flow) I.D. the writer suggests the reading of paper of Staley et al. (2013), for its study on threshold definition, and that of Gregoretti and Dalla Fontana (2007) for the triggering rainfall definition and the comparison between different D.F. thresholds.

At line 8 of page 5, it is stated that I.D. relates the role of antecedent moisture condition of debris flow initiation. The writer has a very large doubt about it. How a rainfall event (i.e. rainfall intensity and duration) could give information on the previous rainfall to which the antecedent moisture conditions relate? This depends on the threshold. Usual D.F. thresholds use the triggering rainfall (Gregoretti and Dalla Fontana, 2007; Staley et al. 2013). If authors use another rainfall to compare to the threshold, this should be initially stated and explained. The writer gave a quick read to the work of Meyer et al. (2012). The methodology used for the thresholds is suitable for landslide-

induced debris flows but not in the case of runoff-generated debris flow (Coe et al., 2008; Gregoretti and Dalla Fontana, 2008; Okano et al., 2012; Theule et al., 2012; Hurlimann et al., 2014). In runoff generated debris flow, the duration of the triggering rainfall usually range in the 15-60 minutes interval and debris flow initiation is not dependent on rainfall duration.

Moreover, in many cases, runoff generated debris flows are usually triggered when the terrain is in dry conditions where the role of the antecedent moisture conditions is negligible (this could not be the case of Norway).

Moreover, the use of the PDN day for normalizing the rainfall should be better justified. The hydrological response depends also on the terrain typology. In this case, the pdn could be not work. In addition, with climate change, the rainfalls tend to concentrated in a restricted interval so that the influence of the PDN could decreases. Then, authors should better introduce and justify the adopted thresholds.

## **2,4 Risk analyses**

At line 38 of page 5, the sentence “The model aims to give information “ seems unclear. About last sentence of page 5, the writer suggests some graphs or a brief appendix.

### **3.1.4**

How the results shown in Figure 6 were obtained?

Authors just write a list without explaining the source.

### **3.2.1-2**

NHESS is a scientific journal: authors should introduce something about susceptibility map and model for debris flow initiation: is that presented at 2.3? Which is the relation between rainfall threshold and orientation of slope?

Moreover, at line 30 of page 7 it should be Meyer rather than Mayer.

## **3.4**

At line 22 of page 8 in landslide are also included debris flow and rockfall?

At line 8 of page 9 it should be section 3.4 rather than section 2.4

At lines 17-18 of page 9: the writer does not understand how risk modelling provides the mitigation.

Coe, J.A., Kinner D.A., Godt, J.W., 2008. Initiation conditions for debris flows generated by runoff at Chalk Cliffs, central Colorado. *Geomorphology*, 96, 270-297.

Gregoretti, C., Dalla Fontana G., 2008. The triggering of debris flow due to channel-bed failure debris flow in some alpine headwater basins of the Dolomites: analyses of critical runoff. *Hydrological Processes*. 22, 2248-2263.

Iverson R.M. The physics of debris flow. *Review of Geophysics*, 35, 3, 245-296.

Hurlimann M., Abanco C., Moya, J., Vilajosana I. (2014). Results and experiences gathered at the Rebaixader debris-flow monitoring site, Central Pyrenees, Spain. *Landslides*. doi:10.1007/s10346-013-0452-y 161-175

Okano K., H. Suwa, and T. Kanno (2012), Characterization of debris flows by rainstorm condition at a torrent on the Mount Yakedake volcano, Japan, *Geomorphology* 136, 88--94

Staley DM, Kean JW, Cannon SH, Schmidt KM, Laber JL. 2013. Objective definition of rainfall intensity-duration thresholds for the initiation of post-fire debris flows in southern California. *Landslides* 10: 547 – 562.

Theule, J.I., Liebault, F., Loye, A., Laigle, D., and Jaboyedoff, M., 2012. Sediment budget monitoring of debris flow and bedload transport in the Manival Torrent, SE France. *Natural Hazard Earth Sciences*, 12, 731--749
